# Supplementary material for: What Makes a Confident Surgeon? A survey on Surgical Trainee perspectives from Kenya, China, and Mali
Source: Research Square preprint supplement (doi:10.21203/rs.3.rs-6518286/v1), 2025-05-27
Supplement: Supplementary file 1 [file a69dd4304934ed047300ce7b.docx]

1. **Variables**
2. Reassign the options

| Item | Variable assignment | |
| --- | --- | --- |
| 0 | 1 |
| Q2 | No | Yes |
| Q11 | No | Yes |
| Q12 | No | Yes |
| Q16 | No | Yes |
| Q17 | No | Yes |
| Q20 | No | Yes |
| Q21 | No | Yes |
| Q22 | No | Yes |
| Q28 | No | Yes |
| Q29 | No | Yes |
| Q33 | No | Yes |

| Item | Variable assignment | | | | |
| --- | --- | --- | --- | --- | --- |
| 1 | 2 | 3 | 4 | 5 |
| Q7 | None | 1 hour | 2 hours | 3 hours | > 3 hours |

1. Combined variable classification

| Item | Coded assignment | |
| --- | --- | --- |
| 0 no | 1 yes |
| Q3 | NO/Maybe | Yes |
| Q8 | Seldom/Never | Often |
| Q18 | NO/Maybe | Yes |
| Q23 | NO/Same as before | Yes |
| Q25 | Somewhat understand  Did not understand well  Did not understand at all | Full understand  Mostly understand |
| Q26 | 50%  25%  0% | 100%  75% |
| Q30 | Seldom  Never | Often  Sometimes |
| Q34 | None of the operations | Every operation  Most operation  Half of the operations |
| Q35 | Never | Always  Sometimes |

| Item | Coded assignment | | | |
| --- | --- | --- | --- | --- |
| 1 | 2 | 3 | 4 |
| Q7 | None | 1 hour | 2 hours | ≥ 3 hours |

1. Outcome index

q18_2.1: Do you have confidence to operate independently after training? （No/Yes）

q23_2.1: Do you prefer surgery after training? （No/Yes）

1. **Statistical Handling Results Output**

Table 2.2.1 Single factor analysis of surgical confidence after training (N=274)

| **Variable** | | **N** | **%** | **Feel confident** | | | | ***χ2*** | ***p*** |
| --- | --- | --- | --- | --- | --- | --- | --- | --- | --- |
| **No** | | **Yes** | |
| Specialty decision |  |  |  |  |  |  |  | 18.205 | ***<0.001*** |
| no | 121 | 44.2 | 102 | 52.3 | 19 | 24.1 |  |  |
| yes | 153 | 55.8 | 93 | 47.7 | 60 | 75.9 |  |  |
| Time spent studying after work. |  |  |  |  |  |  |  | 1.632 | *0.652* |
| none | 36 | 13.1 | 27 | 13.8 | 9 | 11.4 |  |  |
| 1 h | 79 | 28.8 | 59 | 30.3 | 20 | 25.3 |  |  |
| 2 h | 85 | 31.0 | 60 | 30.8 | 25 | 31.6 |  |  |
| ≥ 3 h | 74 | 27.0 | 49 | 25.1 | 25 | 31.6 |  |  |
| Read SCI published medical articles |  |  |  |  |  |  |  | 1.893 | *0.169* |
| no | 180 | 65.7 | 133 | 68.2 | 47 | 59.5 |  |  |
| yes | 94 | 34.3 | 62 | 31.8 | 32 | 40.5 |  |  |
| Participate in operations every week |  |  |  |  |  |  |  | 6.657 | ***0.010*** |
| no | 120 | 43.8 | 95 | 48.7 | 25 | 31.6 |  |  |
| yes | 154 | 56.2 | 100 | 51.3 | 54 | 68.4 |  |  |
| Primary surgeon or assistant |  |  |  |  |  |  |  | 19.529 | ***<0.001*** |
| no | 80 | 29.2 | 72 | 36.9 | 8 | 10.1 |  |  |
| yes | 194 | 70.8 | 123 | 63.1 | 71 | 89.9 |  |  |
| Be assessed |  |  |  |  |  |  |  | 19.379 | ***<0.001*** |
| no | 84 | 30.7 | 75 | 38.5 | 9 | 11.4 |  |  |
| yes | 190 | 69.3 | 120 | 61.5 | 70 | 88.6 |  |  |
| Written exam |  |  |  |  |  |  |  | 19.400 | ***<0.001*** |
| no | 108 | 39.4 | 93 | 47.7 | 15 | 19.0 |  |  |
| yes | 166 | 60.6 | 102 | 52.3 | 64 | 81.0 |  |  |
| Practical exam |  |  |  |  |  |  |  | 21.800 | ***<0.001*** |
| no | 130 | 47.4 | 110 | 56.4 | 20 | 25.3 |  |  |
| yes | 144 | 52.6 | 85 | 43.6 | 59 | 74.7 |  |  |
| Understand steps and techniques prior to surgery |  |  |  |  |  |  |  | 16.376 | ***<0.001*** |
| no | 103 | 37.6 | 88 | 45.1 | 15 | 19.0 |  |  |
| yes | 171 | 62.4 | 107 | 54.9 | 64 | 81.0 |  |  |
| Master the operation before you start |  |  |  |  |  |  |  | 29.511 | ***<0.001*** |
| no | 163 | 59.5 | 136 | 69.7 | 27 | 34.2 |  |  |
| yes | 111 | 40.5 | 59 | 30.3 | 52 | 65.8 |  |  |
| Superior physician checks preoperative preparation |  |  |  |  |  |  |  | 14.259 | ***<0.001*** |
| no | 75 | 27.4 | 66 | 33.8 | 9 | 11.4 |  |  |
| yes | 199 | 72.6 | 129 | 66.2 | 70 | 88.6 |  |  |
| Good team communication during the operation |  |  |  |  |  |  |  | 13.878 | ***<0.001*** |
| no | 70 | 25.5 | 62 | 31.8 | 8 | 10.1 |  |  |
| yes | 204 | 74.5 | 133 | 68.2 | 71 | 89.9 |  |  |
| Received the guidance of senior doctors during the operation |  |  |  |  |  |  |  | 4.989 | ***0.026*** |
| no | 28 | 10.2 | 25 | 12.8 | 3 | 3.8 |  |  |
| yes | 246 | 89.8 | 170 | 87.2 | 76 | 96.2 |  |  |
| Reference the textbook after operation |  |  |  |  |  |  |  | 6.089 | ***0.014*** |
| no | 40 | 14.6 | 35 | 17.9 | 5 | 6.3 |  |  |
| yes | 234 | 85.4 | 160 | 82.1 | 74 | 93.7 |  |  |
| Share impressions after surgery |  |  |  |  |  |  |  | 5.511 | ***0.019*** |
| no | 34 | 12.4 | 30 | 15.4 | 4 | 5.1 |  |  |
| yes | 240 | 87.6 | 165 | 84.6 | 75 | 94.9 |  |  |

Table 2.3.1 Single factor analysis of surgical preference after training(N=274)

| **Variable** | | **N** | **%** | **Surgical preference** | | | | ***χ2*** | **p** |
| --- | --- | --- | --- | --- | --- | --- | --- | --- | --- |
| **No** | | **Yes** | |
| Specialty decision |  |  |  |  |  |  |  | 20.081 | **<0.001** |
| no | 121 | 44.2 | 74 | 58.7 | 47 | 31.8 |  |  |
| yes | 153 | 55.8 | 52 | 41.3 | 101 | 68.2 |  |  |
| Time spent studying after work. |  |  |  |  |  |  |  | 4.331 | 0.228 |
| none | 36 | 13.1 | 20 | 15.9 | 16 | 10.8 |  |  |
| 1 h | 79 | 28.8 | 38 | 30.2 | 41 | 27.7 |  |  |
| 2 h | 85 | 31.0 | 41 | 32.5 | 44 | 29.7 |  |  |
| ≥ 3 h | 74 | 27.0 | 27 | 21.4 | 47 | 31.8 |  |  |
| Read SCI published medical articles |  |  |  |  |  |  |  | 2.527 | 0.112 |
| no | 180 | 65.7 | 89 | 70.6 | 91 | 61.5 |  |  |
| yes | 94 | 34.3 | 37 | 29.4 | 57 | 38.5 |  |  |
| Participate in operations every week |  |  |  |  |  |  |  | 25.869 | **<0.001** |
| no | 120 | 43.8 | 76 | 60.3 | 44 | 29.7 |  |  |
| yes | 154 | 56.2 | 50 | 39.7 | 104 | 70.3 |  |  |
| Primary surgeon or assistant |  |  |  |  |  |  |  | 21.056 | **<0.001** |
| no | 80 | 29.2 | 54 | 42.9 | 26 | 17.6 |  |  |
| yes | 194 | 70.8 | 72 | 57.1 | 122 | 82.4 |  |  |
| Be assessed |  |  |  |  |  |  |  | 16.333 | **<0.001** |
| no | 84 | 30.7 | 54 | 42.9 | 30 | 20.3 |  |  |
| yes | 190 | 69.3 | 72 | 57.1 | 118 | 79.7 |  |  |
| Written exam |  |  |  |  |  |  |  | 4.275 | **0.039** |
| no | 108 | 39.4 | 58 | 46 | 50 | 33.8 |  |  |
| yes | 166 | 60.6 | 68 | 54 | 98 | 66.2 |  |  |
| Practical exam |  |  |  |  |  |  |  | 10.297 | **0.001** |
| no | 130 | 47.4 | 73 | 57.9 | 57 | 38.5 |  |  |
| yes | 144 | 52.6 | 53 | 42.1 | 91 | 61.5 |  |  |
| Understand steps and techniques prior to surgery |  |  |  |  |  |  |  | 15.310 | **<0.001** |
| no | 103 | 37.6 | 63 | 50 | 40 | 27 |  |  |
| yes | 171 | 62.4 | 63 | 50 | 108 | 73 |  |  |
| Master the operation before you start |  |  |  |  |  |  |  | 3.945 | **0.047** |
| no | 163 | 59.5 | 83 | 65.9 | 80 | 54.1 |  |  |
| yes | 111 | 40.5 | 43 | 34.1 | 68 | 45.9 |  |  |
| Superior physician checks preoperative preparation |  |  |  |  |  |  |  | 8.166 | **0.004** |
| no | 75 | 27.4 | 45 | 35.7 | 30 | 20.3 |  |  |
| yes | 199 | 72.6 | 81 | 64.3 | 118 | 79.7 |  |  |
| Good team communication during the operation |  |  |  |  |  |  |  | 9.027 | **0.003** |
| no | 70 | 25.5 | 43 | 34.1 | 27 | 18.2 |  |  |
| yes | 204 | 74.5 | 83 | 65.9 | 121 | 81.8 |  |  |
| Received the guidance of senior doctors during the operation |  |  |  |  |  |  |  | 2.724 | 0.099 |
| no | 28 | 10.2 | 17 | 13.5 | 11 | 7.4 |  |  |
| yes | 246 | 89.8 | 109 | 86.5 | 137 | 92.6 |  |  |
| Reference the textbook after operation |  |  |  |  |  |  |  | 0.800 | 0.371 |
| no | 40 | 14.6 | 21 | 16.7 | 19 | 12.8 |  |  |
| yes | 234 | 85.4 | 105 | 83.3 | 129 | 87.2 |  |  |
| Share impressions after surgery |  |  |  |  |  |  |  | 5.477 | **0.019** |
| no | 34 | 12.4 | 22 | 17.5 | 12 | 8.1 |  |  |
| yes | 240 | 87.6 | 104 | 82.5 | 136 | 91.9 |  |  |

Model comparison was performed in R (v4.4.3) using the 'lme4' package.

Table 2.3.2 Model comparison and Hypothesis test

| **Model** | ***AIC*** | ***BIC*** | **-2 Log Likelihood** | ***χ2*** | **p** |
| --- | --- | --- | --- | --- | --- |
| Fixed-effects model | 380.08 | 383.69 | 378.08 | - | - |
| Mixed-effects model (including random effects Country) | 370.18 | 377.41 | 366.18 | 11.892 | ***＜0.001**** |

*The boundary-corrected p value（multiplied by 0.5）accounts for testing a non-negative variance parameter.

Table 2.3.3 Random effects variance estimates

| **Level** | **Variance Component** | ***SD*** | ***ICC*** |
| --- | --- | --- | --- |
| Country | 0.141 | 0.375 | 4.1% |

The likelihood ratio test results showed that the random effect was significant, so a 2-level logistic regression model was used to analyze the influencing factors of postoperative preference.
