# Supplementary material for: What Makes a Confident Surgeon? A survey on Surgical Trainee perspectives from Kenya, China, and Mali
Source: Research Square preprint supplement (doi:10.21203/rs.3.rs-6518286/v1), 2025-05-27
Supplement: Supplementary file 2 [file e54a125786326c9403e1dd0d.docx]

**Checklist for Reporting Results of Internet E-Surveys (CHERRIES)**

| ***Item Category*** | ***Checklist Item*** | ***Explanation*** |
| --- | --- | --- |
| Design | Describe survey design | This was a cross-sectional study using a convenience sample method to survey medical trainees and professionals in the surgical departments of the respective universities and their affiliated hospitals in Kenya, China, and Mali. Participants were invited via medical trainee societies and social media platforms. |
| IRB (Institutional Review Board) approval and informed consent process | IRB approval | Zhejiang Provincial Peoples Hospital granted ethical approval for this study. |
| Informed consent | Respondents were informed about the purpose of the survey, anonymity, confidentiality, and voluntary principles before proceeding. Additionally, no personal identifiers were collected. |
| Data protection | Responses were anonymous. Data were stored in password-protected Excel files and handled only by the research team. No login or registration was required. |
| Development and pretesting | Development and testing | The questionnaire was created following a literature review and consensus process by two surgeons, and piloted among Chinese surgical trainees and international medical interns in China. The final version was developed in English and translated into French and Chinese after translation verification by experts. |
| Recruitment process and description of the sample having access to the questionnaire | Open survey versus closed survey | Open survey. The questionnaire was accessible through publicly shared quick links, and QR code. |
| Contact mode | Participants accessed the survey through QR codes or direct links shared on messaging platforms (e.g., WhatsApp, WeChat, Tencent, Twitter). |
| Advertising the survey | The survey was disseminated informally via peer networks, student societies, and surgical communities. No external advertising was conducted. |
| Survey administration | Web/E-mail | The survey was hosted using Microsoft Forms®, Google Forms®, and Questionnet App®. Distribution occurred via shared links; no institutional logins were required |
| Context | The platforms were solely used for anonymous data collection. No institutional tracking or personal data collection features were enabled. |
| Mandatory/voluntary | Participation in the survey was entirely voluntary. |
| Incentives | No financial or non-financial incentives were provided to participants. |
| Time/Date | This data was collected between December 2023 and March 2024. |
| Randomization of items or questionnaires | Questions were presented in a fixed order; no randomization was applied. |
| Adaptive questioning | No. Skip logic was not applied so respondents could not bypass sections. |
| Number of Items | 38 items in various formats (multiple-choice, Likert-scale, open text). |
| Number of screens (pages) | 1 continuous page |
| Completeness check | Survey platforms were set to enforce responses for required fields. There were no Optional or open-text items that could be skipped |
| Review step | Respondents were not allowed to go 'back' in the survey. However, they were asked to confirm that the current answer was correct before clicking to enter the next page |
| Response rates | Unique site visitor | N/A |
| View rate (Ratio of unique survey visitors/unique site visitors) | The survey is voluntary. Data collection platforms did not track views. |
| Participation rate (Ratio of unique visitors who agreed to participate/unique first survey page visitors) | The data collection platforms did not record the number of viewers versus participants. |
| Completion rate (Ratio of users who finished the survey/users who agreed to participate) | Only completed surveys were submitted; participants gave consent upon submission. Partial responses were not analyzed. |
| Preventing multiple entries from the same individual | Cookies used | Cookies were not used. |
| IP check | Survey platforms limited responses to one submission per IP address to prevent duplicate entries. |
| Log file analysis | N/A |
| Registration | N/A |
| Analysis | Handling of incomplete questionnaires | Only fully completed surveys were included in the analysis. Minor missing values, the average value interpolation method was used appropriately. |
| Questionnaires submitted with an atypical timestamp | Participants could re-enter the survey in case of connection interruptions, as the system has a cache mechanism However, responses submitted after the survey deadline were excluded. |
| Statistical correction | Appropriate methods were applied: Binary logistic regression and mixed-effects logistic regression were used to model primary outcomes. Country was modeled as a random intercept after comparative model testing. Details are included in the supplementary materials. Statistical significance was defined at p<0.05. |
