# Supplementary material for: What Makes a Confident Surgeon? A survey on Surgical Trainee perspectives from Kenya, China, and Mali
Source: Research Square preprint supplement (doi:10.21203/rs.3.rs-6518286/v1), 2025-05-27
Supplement: Supplementary file 3 [file e7f27da0d3b65ddd1b20083f.docx]

**What Makes a Confident Surgeon? A survey on Surgical Trainee perspectives from Kenya, China, and Mali**

INFORMATION AND CONSENT FORM

| Investigators; Department and Affiliations:  Sidney Moses Amadi, Post graduate General Surgery Year 2. Zhejiang Chinese Medical University. Research trainee Association Academic of Surgeons, Member Society of Laparoscopic and Robotic Surgeons.  Jing Zhu Reproductive Medicine Centre, Department of Reproductive Endocrinology,  Zhejiang Provincial People’s Hospital |
| --- |

RESEARCHER'S STATEMENT:

We are inviting you to contribute in a research study conducted by Zhejiang Provincial Peoples Hospital and Zhejiang Chinese Medical University comparing surgical training experiences across Kenya, Mali, and China through an online survey. This study will highlight common shared challenges and offer unique forms of solutions applied for each diverse setting. The purpose of this form is to provide you with the information you need to decide whether to participate in the study. Please read this information carefully.

PURPOSE OF THE STUDY:

This project aims to provide evidence of country specific approaches that could bridge the gap between graduate expectations and improve surgical education.

STUDY PROCEDURES:

| If you choose to participate in this study, please proceed to the:   1. Google Form Document for Surgical Training Survey in Kenya <https://docs.google.com/forms/d/e/1FAIpQLScTOQA8_XyCBiUpe2vIg8f581bUVBKfIbXaelza8GssrbhPCQ/viewform?usp=sharing> 2. MALI Questionnaire sur la formation chirurgicale <https://forms.office.com/r/qdjdQqdpfD?origin=lprLink> 3. China Questionnaire Questionnet app QR Code on Wechat     OTHER INFORMATION:  To participate in this study, you must:  - Be 18 years of age or older  - Have at least 3 months surgery experience in a hospital work environment  - Be a medical intern and above.  Participation in this study is voluntary, and you can withdraw at any time. The information you provide will be anonymous and will not be linked to your name. Your responses are not intended to identify you. If you have any questions about your rights as a research subject, please contact us.  The contact person for this study is Sidney Moses Amadi at sidneyogah@live.com  By clicking the links above, you indicate that you have read and understood the information provided, and that you agree to participate in this study. |
| --- |

All participants are required to conclude this online informed consent prior to participate in this study.
