# Supplementary material for: What Makes a Confident Surgeon? A survey on Surgical Trainee perspectives from Kenya, China, and Mali
Source: Research Square preprint supplement (doi:10.21203/rs.3.rs-6518286/v1), 2025-05-27
Supplement: Supplementary file 4 [file ff7133dc0e66bceab1eb7008.docx]

1.Are you a medical officer in your surgical residency/Masters training?

a. Yes

b. No

c. I have completed residency/Masters

2.Are you a senior medical officer/medical officer intern who has completed the surgical rotation internship?

a. Yes

b. No

3.Have you decided on your specialty?

a. Yes

b. No

c. Maybe

4.How long is/was the duration of your surgical training?

a. 1 - 3 months

b. 6 months

c. 1 year

d. 3 years

e. > 5 years

5.How long is/was the duration of your workday?

a. 8AM to 6PM (10 hours)

b. <10 hours

c. >10 hours

6.How long did/do you work on weekends?

a. 8AM to 6PM (10 hours)

b. <10 hours

c. >10 hours

7.How many hours did/do you spend studying after work?

a. 3 hours

b. 2 hours

c. 1 hour

d. >3 hours

e. none

8.Did/Do you read any SCI published medical articles during your studying?

a. Often

b. Seldom

c. Never

9.During your surgical training what did/do you spend most of your time on?

a. Operations

b. Ward works

c. Outpatient clinics

d. Medical research

e. Studying

10.What part of your training do/did you think was/is most useful?

Response: _______________

11.Did/Do you take part in operations every week?

a. Yes

b. No

12.Are/Were you an active participant during operations? (Active participant meaning: primary surgeon or assistant i.e. (first/second)

a. Yes

b. No

13Which operations did/do you perform most often?

Response: _________________________

14Which operations did/do you enjoy the most?

Response: _________________________

15In your opinion, which procedure would you consider to be the most challenging as a primary surgeon and as a first/second assistant?

Response: _________________________

16.Would you still want to participate in surgical training if you didn’t/don’t have the opportunity to operate?

a. Yes

b. No

17Would you lose interest in surgery if you were/are not allowed to participate in operations? (Not including simple tasks like retracting, skin suturing)

a. Yes

b. No

18.Do/Did you feel confident performing some Gastro intestinal surgery operations independently after your surgical training?

a. Yes

b. No

c. Maybe

19What Gastro intestinal operation(s)?

Response: _______________

20.Are/Were you assessed during your surgical training?

a. Yes

b. No

21.Do/Did you take a written exam?

a. Yes

b. No

22.Do/Did you take a practical (surgical or procedural) exam?

a. Yes

b. No

23.How much do/did you like surgery after your surgical training?

a. More

b. Less

c. Same as before

24.What resources did/do you take advantage of to help you learn procedures?

a. Text books

b. Multimedia

c. Workshops

d. Intra-operation demonstration

e. 3D printed model training

Other: _________________________

25.During your surgical training, how well did/do you understand the steps and techniques of procedures prior to starting the operation?

a. Fully understood

b. Mostly understood

c. Somewhat understood

d. Did not understand well

e. Did not understand at all

26.What percent of the procedures, you performed during your training; did/do you feel you were/are totally proficient at prior to starting the operation?

a. 100%

b. 75%

c. 50%

d. 25%

e. 0%

27.Who was/is responsible for most of your teaching during your training?

a. Attending surgeon (consultant)

b. Fellow

c. Senior resident/registrar

d. No one

28.Did/Does an attending surgeon or fellow check your preparation for the operation before the operation started?

a. Yes

b. No

29.Did/Do you feel that the level and quality of communication between you and the rest of the surgical team was adequate and appropriate during surgery?

a. Yes

b. No

30.How often were/are you guided by senior residents/registrars and/or attendings during surgery?

a. Often

b. Sometimes

c. Seldom

d. Never

31.What kind of feedback did/do you receive from senior doctors during surgery?

a. Mainly positive evaluation

b. Mainly negative evaluation

c. Half and half

d. No evaluation

32.Which feedback did/do you think was/is more helpful for you?

a. Mainly positive evaluation

b. Mainly negative evaluation

c. Half and half

d. No evaluation

33.Do/Did you write procedure notes after completing an operation?

a. Yes

b. No

34.How often did/do you reference the textbook after an operation?

a. Every operation

b. Most operation

c. Half of the operations

d. None of the operations

35.How often did/do you share your impressions about the operation with the senior doctor after surgery?

a. Always

b. Sometimes

c. Never

36.How often did/do you review the patients whose procedure you took part in?

a. Always

b. Sometimes

c. Never

37.How often did/do you review the patients whose procedure you did NOT take part in?

a. Always

b. Sometimes

c. Never

38.Would you be more interested in learning about a patient’s disease if you took part in their operation?

a. Yes

b. No

c. Maybe
